# Supplementary material
Source: MDPI journal article supplement (https://www.mdpi.com/2071-1050/13/22/12768)
Supplement: s1 [file s1]

**Table S1.** Results of Mann-Whitney U tests regarding the influence of different conservation post characteristics on the four success dimensions (n per platform = 300).

| Social network | Dependent variable | Independent variable | Median with characteristic | Median without characteristic | p-value | Impact <sup>1</sup> |
|----------------|--------------------|----------------------|----------------------------|-------------------------------|---------|---------------------|
| Facebook       | Reactions          | Hashtag              | 0.364                      | 0.275                         | 0.047   | ↑*                  |
|                |                    | Link                 | 0.290                      | 0.337                         | 0.370   | not significant     |
|                |                    | Emoji                | 0.223                      | 0.424                         | 0.000   | ↓***                |
|                |                    | Image                | 0.314                      | 0.200                         | 0.019   | ↑*                  |
|                |                    | Video                | 0.194                      | 0.314                         | 0.021   | ↓*                  |
|                |                    | Interaction prompt   | 0.331                      | 0.296                         | 0.770   | not significant     |
|                | Comments           | Hashtag              | 0.017                      | 0.020                         | 0.385   | not significant     |
|                |                    | Link                 | 0.018                      | 0.011                         | 0.204   | not significant     |
|                |                    | Emoji                | 0.019                      | 0.017                         | 0.636   | not significant     |
|                |                    | Image                | 0.022                      | 0.009                         | 0.001   | ↑**                 |
|                |                    | Video                | 0.009                      | 0.022                         | 0.001   | ↓**                 |
|                |                    | Interaction prompt   | 0.024                      | 0.017                         | 0.979   | not significant     |
|                | Shares             | Hashtag              | 0.077                      | 0.045                         | 0.021   | ↑*                  |
|                |                    | Link                 | 0.050                      | 0.047                         | 0.883   | not significant     |
|                |                    | Emoji                | 0.045                      | 0.067                         | 0.069   | not significant     |
|                |                    | Image                | 0.055                      | 0.039                         | 0.415   | not significant     |
|                |                    | Video                | 0.037                      | 0.056                         | 0.367   | not significant     |
|                |                    | Interaction prompt   | 0.048                      | 0.050                         | 0.807   | not significant     |
|                | Overall engagement | Hashtag              | 0.491                      | 0.349                         | 0.054   | not significant     |
|                |                    | Link                 | 0.389                      | 0.410                         | 0.705   | not significant     |
|                |                    | Emoji                | 0.310                      | 0.491                         | 0.001   | ↓***                |
|                |                    | Image                | 0.417                      | 0.266                         | 0.022   | ↑*                  |
|                |                    | Video                | 0.264                      | 0.417                         | 0.023   | ↓*                  |
|                |                    | Interaction prompt   | 0.375                      | 0.398                         | 0.768   | not significant     |
| Twitter        | Reactions          | Hashtag              | 0.032                      | 0.035                         | 0.243   | not significant     |
|                |                    | Link                 | 0.036                      | 0.010                         | 0.000   | ↑***                |
|                |                    | Emoji                | 0.029                      | 0.048                         | 0.017   | ↓*                  |
|                |                    | Image                | 0.058                      | 0.008                         | 0.000   | ↑***                |
|                |                    | Video                | 0.017                      | 0.034                         | 0.653   | not significant     |
|                |                    | Interaction prompt   | 0.017                      | 0.035                         | 0.352   | not significant     |
|                | Comments           | Hashtag              | 0.000                      | 0.001                         | 0.051   | not significant     |
|                |                    | Link                 | 0.000                      | 0.000                         | 0.386   | not significant     |
|                |                    | Emoji                | 0.001                      | 0.000                         | 0.050   | ↑*                  |
|                |                    | Image                | 0.001                      | 0.000                         | 0.001   | ↑***                |
|                |                    | Video                | 0.000                      | 0.000                         | 0.507   | not significant     |
|                |                    | Interaction prompt   | 0.001                      | 0.000                         | 0.080   | not significant     |
|                | Shares             | Hashtag              | 0.010                      | 0.015                         | 0.299   | not significant     |
|                |                    | Link                 | 0.012                      | 0.002                         | 0.000   | ↑***                |

|                       |                       |       |       |       |                 |
|-----------------------|-----------------------|-------|-------|-------|-----------------|
| Overall<br>engagement | Emoji                 | 0.001 | 0.027 | 0.036 | ↓*              |
|                       | Image                 | 0.023 | 0.002 | 0.000 | ↑***            |
|                       | Video                 | 0.004 | 0.012 | 0.220 | not significant |
|                       | Interaction<br>prompt | 0.004 | 0.012 | 0.110 | not significant |
|                       | Hashtag               | 0.009 | 0.020 | 0.001 | ↓***            |
|                       | Link                  | 0.010 | 0.008 | 0.251 | not significant |
|                       | Emoji                 | 0.024 | 0.006 | 0.000 | ↑***            |
|                       | Image                 | 0.011 | 0.008 | 0.040 | ↑*              |
|                       | Video                 | 0.013 | 0.010 | 0.676 | not significant |
|                       | Interaction<br>prompt | 0.022 | 0.010 | 0.248 | not significant |

<sup>1</sup> ↑ indicates a positive impact, ↓ indicates a negative impact; significance levels: \* p < 0.05, \*\* p < 0.01, \*\*\* p < 0.001.

**Table S2.** Results of Spearman's rank correlation analyses regarding the influence of character count on the four success dimensions (n per platform = 300).

| Social network | Dependent variable | Rho    | p-value | Effect strength <sup>1</sup> | Impact of character count <sup>2</sup> |
|----------------|--------------------|--------|---------|------------------------------|----------------------------------------|
| Facebook       | Reactions          | 0.337  | 0.000   | medium                       | ↑***                                   |
|                | Comments           | 0.167  | 0.004   | weak                         | ↑**                                    |
|                | Shares             | 0.248  | 0.000   | weak                         | ↑***                                   |
|                | Overall engagement | 0.322  | 0.000   | medium                       | ↑***                                   |
| Twitter        | Reactions          | 0.399  | 0.000   | medium                       | ↑***                                   |
|                | Comments           | -0.033 | 0.570   | –                            | not significant                        |
|                | Shares             | 0.397  | 0.000   | medium                       | ↑***                                   |
|                | Overall engagement | -0.180 | 0.002   | weak                         | ↓**                                    |

<sup>1</sup> effect strength according to Cohen 1992 (weak effect – absolute value of Rho  $\geq$  0.10, medium effect – absolute value of Rho  $\geq$  0.30, strong effect – absolute value of Rho  $\geq$  0.50).

<sup>2</sup> ↑ indicates a positive correlation, ↓ indicates a negative correlation; significance levels: \* p < 0.05, \*\* p < 0.01, \*\*\* p < 0.001.
